# Supplementary material for: A shunt pathway limits the CaaX processing of Hsp40 Ydj1p and regulates Ydj1p-dependent phenotypes
Source: eLife. 2016 Aug 15;5:e15899. doi: 10.7554/eLife.15899 (PMC5014548; doi:10.7554/eLife.15899)
Supplement: Figure 3—source data 1. — Data points included in the analysis are from time segments of exponential growth. DOI: http://dx.doi.org/10.7554/eLife.15899.008 [file elife-15899-fig3-data1.xlsx]

## Sheet: A600 vs Min
plasmid 1: 2µ URA3 Ppgk>		vector	vector	vector	vector	vector	vector	vector	vector		YDJ1-CASQ	YDJ1-CASQ	YDJ1-CASQ	YDJ1-CASQ	YDJ1-CASQ	YDJ1-CASQ	YDJ1-CASQ	YDJ1-CASQ		YDJ1-SASQ	YDJ1-SASQ	YDJ1-SASQ	YDJ1-SASQ	YDJ1-SASQ	YDJ1-SASQ	YDJ1-SASQ	YDJ1-SASQ		YDJ1-CTLM	YDJ1-CTLM	YDJ1-CTLM	YDJ1-CTLM	YDJ1-CTLM	YDJ1-CTLM	YDJ1-CTLM	YDJ1-CTLM		YDJ1-CVIA	YDJ1-CVIA	YDJ1-CVIA	YDJ1-CVIA	YDJ1-CVIA	YDJ1-CVIA	YDJ1-CVIA	YDJ1-CVIA
plasmid 2: CEN LEU2		vector	vector	vector	vector	STE14	STE14	STE14	STE14		vector	vector	vector	vector	STE14	STE14	STE14	STE14		vector	vector	vector	vector	STE14	STE14	STE14	STE14		vector	vector	vector	vector	STE14	STE14	STE14	STE14		vector	vector	vector	vector	STE14	STE14	STE14	STE14
	0									0	0.02625	0.02325	0.02525	0.02925	0.02025	0.02525	0.02525	0.02825	0	0.02225	0.02225	0.02125	0.02725	0.02025	0.02025	0.02025	0.02425	0	0.02125	0.02025	0.02825	0.03325			0.02425	0.02625	0
	4									4	0.02575	0.02275	0.02575	0.02975	0.02175	0.02575	0.02575	0.02875	4	0.02375	0.02375	0.02175	0.02875	0.02075	0.01975	0.02075	0.02575	4	0.02275	0.02075	0.02975	0.03375			0.02475	0.02575	4
	8									8	0.027	0.024	0.027	0.031	0.022	0.027	0.026	0.029	8	0.025	0.023	0.023	0.029	0.021	0.021	0.021	0.026	8	0.023	0.021	0.031	0.034			0.025	0.026	8	0.029	0.029	0.034	0.033	0.019	0.019	0.024	0.024
	12									12	0.029	0.024	0.028	0.031	0.022	0.029	0.027	0.029	12	0.026	0.024	0.023	0.029	0.022	0.021	0.022	0.026	12	0.024	0.022	0.031	0.034			0.025	0.027	12	0.029	0.03	0.035	0.039	0.02	0.023	0.024	0.025
	16									16	0.03025	0.02525	0.02825	0.03225	0.02325	0.02925	0.02825	0.03025	16	0.02625	0.02525	0.02425	0.02925	0.02225	0.02225	0.02225	0.02725	16	0.02525	0.02225	0.03325	0.03425			0.02625	0.02725	16	0.02925	0.03025	0.03525	0.03425	0.02025	0.02125	0.02425	0.02525
	20									20	0.031	0.027	0.031	0.032	0.023	0.029	0.028	0.031	20	0.027	0.025	0.024	0.031	0.023	0.022	0.022	0.027	20	0.026	0.023	0.033	0.036			0.026	0.027	20	0.029	0.031	0.036	0.035	0.021	0.02	0.024	0.025
	24									24	0.03025	0.02625	0.03125	0.03225	0.02325	0.03025	0.02825	0.03125	24	0.02725	0.02525	0.02425	0.03125	0.02325	0.02225	0.02225	0.02725	24	0.02625	0.02325	0.03425	0.03625			0.02625	0.02725	24	0.03025	0.03125	0.03625	0.03425	0.02025	0.02025	0.02425	0.02525
	28									28	0.03225	0.02625	0.03025	0.03325	0.02325	0.03225	0.02925	0.03125	28	0.02825	0.02625	0.02425	0.03125	0.02325	0.02225	0.02325	0.02725	28	0.02625	0.02425	0.03525	0.03725			0.02725	0.02725	28	0.03025	0.03125	0.03625	0.03525	0.02125	0.02025	0.02525	0.02625
	32									32	0.0315	0.0285	0.0315	0.0345	0.0255	0.0315	0.0285	0.0325	32	0.0285	0.0265	0.0245	0.0315	0.0235	0.0235	0.0235	0.0285	32	0.0255	0.0245	0.0355	0.0375			0.0275	0.0275	32	0.0305	0.0325	0.0375	0.0425	0.0215	0.0205	0.0245	0.0255
	36									36	0.03225	0.02725	0.03125	0.03325	0.02325	0.03225	0.02925	0.03125	36	0.02925	0.02625	0.02525	0.03125	0.02325	0.02225	0.02225	0.02725	36	0.02625	0.02425	0.03625	0.03625			0.02725	0.02725	36	0.03225	0.03225	0.03725	0.03425	0.02125	0.01925	0.02525	0.02625
	40									40	0.03325	0.02825	0.03325	0.03425	0.02425	0.03225	0.02925	0.03225	40	0.02925	0.02725	0.02525	0.03125	0.02425	0.02325	0.02325	0.02825	40	0.02725	0.02425	0.03725	0.03825			0.02725	0.02725	40	0.03225	0.03225	0.03825	0.03725	0.02125	0.01925	0.02425	0.02625
	44									44	0.0335	0.0295	0.0325	0.0345	0.0245	0.0325	0.0305	0.0325	44	0.0295	0.0285	0.0255	0.0325	0.0245	0.0235	0.0235	0.0285	44	0.0275	0.0245	0.0365	0.0375			0.0275	0.0275	44	0.0315	0.0335	0.0385	0.0375	0.0205	0.0215	0.0255	0.0265
	48									48	0.0345	0.0295	0.0335	0.0355	0.0245	0.0335	0.0305	0.0335	48	0.0305	0.0285	0.0255	0.0325	0.0245	0.0225	0.0235	0.0285	48	0.0285	0.0245	0.0395	0.0385			0.0275	0.0275	48	0.0325	0.0335	0.0395	0.0355	0.0215	0.0185	0.0255	0.0265
	52	0.03925	0.03625	0.04025	0.04925	0.04525	0.04025	0.04625	0.05025	52	0.03525	0.03025	0.03325	0.03425	0.02525	0.03425	0.03025	0.03225	52	0.03025	0.02825	0.02625	0.03225	0.02525	0.02325	0.02325	0.02825	52	0.02825	0.02425	0.03825	0.03925			0.02725	0.02825	52	0.03225	0.03325	0.03925	0.03725	0.02125	0.02025	0.02425	0.02525
	56	0.0395	0.0375	0.0405	0.0505	0.0465	0.0405	0.0465	0.0505	56	0.0355	0.0305	0.0345	0.0365	0.0245	0.0335	0.0305	0.0325	56	0.0305	0.0285	0.0275	0.0325	0.0255	0.0235	0.0235	0.0275	56	0.0285	0.0255	0.0395	0.0395			0.0285	0.0275	56	0.0325	0.0335	0.0395	0.0365	0.0215	0.0195	0.0245	0.0265
	60	0.03875	0.03775	0.04175	0.05075	0.04675	0.04075	0.04675	0.05075	60	0.03575	0.03075	0.03475	0.03675	0.02575	0.03475	0.02975	0.03375	60	0.03075	0.02875	0.02675	0.03275	0.02475	0.02375	0.02375	0.02775	60	0.02875	0.02675	0.03875	0.03775			0.02875	0.02875	60	0.03275	0.03375	0.03975	0.04075	0.02075	0.01875	0.02475	0.02675
	64	0.0395	0.0375	0.0425	0.0505	0.0455	0.0425	0.0475	0.0515	64	0.0355	0.0305	0.0345	0.0355	0.0255	0.0345	0.0305	0.0335	64	0.0325	0.0285	0.0265	0.0325	0.0255	0.0235	0.0235	0.0285	64	0.0285	0.0265	0.0385	0.0385			0.0275	0.0275	64	0.0325	0.0335	0.0405	0.0405	0.0205	0.0195	0.0235	0.0265
	68	0.04025	0.03725	0.04025	0.05225	0.04625	0.04225	0.04725	0.05125	68	0.03625	0.03025	0.03425	0.03525	0.02725	0.03525	0.03025	0.03425	68	0.03325	0.02925	0.02625	0.03325	0.02525	0.02425	0.02425	0.02825	68	0.02825	0.02625	0.03925	0.03925			0.02825	0.02825	68	0.03325	0.03425	0.04125	0.04125	0.02125	0.01825	0.02525	0.02625
	72	0.04175	0.03875	0.04175	0.05175	0.04875	0.04275	0.04775	0.05375	72	0.03675	0.03075	0.03575	0.03575	0.02575	0.03775	0.03175	0.03375	72	0.03375	0.02975	0.02675	0.03375	0.02575	0.02375	0.02375	0.02875	72	0.02875	0.02575	0.03875	0.04075			0.02775	0.02775	72	0.03375	0.03475	0.04175	0.04275	0.02075	0.01875	0.02475	0.02575
	76	0.0415	0.0395	0.0425	0.0525	0.0485	0.0435	0.0495	0.0535	76	0.0385	0.0305	0.0355	0.0365	0.0265	0.0365	0.0305	0.0345	76	0.0335	0.0295	0.0275	0.0335	0.0255	0.0245	0.0245	0.0285	76	0.0285	0.0265	0.0395	0.0395			0.0285	0.0275	76	0.0335	0.0345	0.0425	0.0435	0.0205	0.0195	0.0245	0.0265
	80	0.042	0.04	0.044	0.053	0.048	0.043	0.049	0.054	80	0.039	0.032	0.035	0.036	0.026	0.038	0.031	0.034	80	0.034	0.03	0.028	0.033	0.025	0.024	0.024	0.028	80	0.03	0.026	0.04	0.04			0.028	0.027	80	0.034	0.034	0.042	0.039	0.021	0.019	0.024	0.026
	84	0.0425	0.0405	0.0445	0.0545	0.0495	0.0455	0.0505	0.0555	84	0.0385	0.0325	0.0375	0.0375	0.0275	0.0385	0.0315	0.0355	84	0.0345	0.0305	0.0285	0.0335	0.0275	0.0255	0.0255	0.0285	84	0.0305	0.0275	0.0415	0.0415			0.0285	0.0285	84	0.0345	0.0355	0.0415	0.0415	0.0225	0.0195	0.0255	0.0265
	88	0.0435	0.0415	0.0455	0.0535	0.0495	0.0465	0.0505	0.0565	88	0.0385	0.0325	0.0375	0.0395	0.0275	0.0375	0.0305	0.0355	88	0.0335	0.0305	0.0275	0.0345	0.0265	0.0245	0.0245	0.0285	88	0.0305	0.0265	0.0415	0.0415			0.0285	0.0285	88	0.0345	0.0345	0.0415	0.0395	0.0205	0.0185	0.0245	0.0255
	92	0.0455	0.0415	0.0465	0.0555	0.0505	0.0475	0.0515	0.0595	92	0.0385	0.0325	0.0375	0.0375	0.0275	0.0385	0.0315	0.0365	92	0.0335	0.0315	0.0275	0.0345	0.0265	0.0245	0.0245	0.0285	92	0.0305	0.0265	0.0405	0.0405			0.0285	0.0275	92	0.0345	0.0355	0.0415	0.0465	0.0215	0.0185	0.0245	0.0255
	96	0.04625	0.04325	0.04825	0.05725	0.05225	0.04725	0.05225	0.06125	96	0.03925	0.03325	0.03725	0.03825	0.02825	0.03725	0.03125	0.03525	96	0.03425	0.03125	0.02725	0.03325	0.02625	0.02525	0.02425	0.02825	96	0.03125	0.02625	0.04125	0.04125			0.02825	0.02725	96	0.03525	0.03525	0.04125	0.04425	0.02125	0.01925	0.02325	0.02625
	100	0.04525	0.04325	0.04825	0.05725	0.05425	0.04925	0.05325	0.06125	100	0.03925	0.03225	0.03625	0.03825	0.02925	0.03925	0.03225	0.03625	100	0.03425	0.03125	0.02825	0.03425	0.02625	0.02525	0.02425	0.02925	100	0.03025	0.02625	0.04225	0.04025			0.02825	0.02725	100	0.03425	0.03625	0.04225	0.03925	0.02025	0.01925	0.02425	0.02525
	104	0.0485	0.0445	0.0495	0.0595	0.0545	0.0495	0.0535	0.0615	104	0.0405	0.0325	0.0375	0.0385	0.0285	0.0395	0.0325	0.0365	104	0.0335	0.0315	0.0285	0.0345	0.0265	0.0255	0.0255	0.0305	104	0.0305	0.0265	0.0415	0.0415			0.0285	0.0275	104	0.0355	0.0365	0.0425	0.0455	0.0215	0.0185	0.0255	0.0265
	108	0.04825	0.04425	0.05025	0.06025	0.05625	0.05125	0.05625	0.06225	108	0.04125	0.03425	0.03725	0.03825	0.03025	0.04125	0.03225	0.03725	108	0.03525	0.03125	0.02825	0.03525	0.02625	0.02525	0.02525	0.02925	108	0.03125	0.02725	0.04225	0.04125			0.02825	0.02825	108	0.03625	0.03725	0.04325	0.04025	0.02025	0.01825	0.02425	0.02625
	112	0.0495	0.0465	0.0515	0.0605	0.0575	0.0525	0.0575	0.0635	112	0.0405	0.0335	0.0375	0.0395	0.0295	0.0395	0.0325	0.0365	112	0.0345	0.0325	0.0285	0.0355	0.0275	0.0255	0.0245	0.0295	112	0.0305	0.0275	0.0415	0.0435			0.0285	0.0285	112	0.0365	0.0375	0.0425	0.0405	0.0205	0.0175	0.0255	0.0265
	116	0.05025	0.04725	0.05225	0.06125	0.05925	0.05425	0.05825	0.06525	116	0.04025	0.03325	0.03825	0.03825	0.03025	0.04125	0.03325	0.03725	116	0.03525	0.03225	0.02925	0.03525	0.02725	0.02625	0.02525	0.02925	116	0.03125	0.02725	0.04225	0.04325			0.02825	0.02725	116	0.03625	0.03725	0.04325	0.04125	0.02025	0.01725	0.02425	0.02625
	120	0.0505	0.0495	0.0535	0.0625	0.0605	0.0555	0.0595	0.0675	120	0.0415	0.0345	0.0385	0.0395	0.0295	0.0415	0.0335	0.0385	120	0.0345	0.0325	0.0285	0.0365	0.0265	0.0265	0.0265	0.0305	120	0.0315	0.0275	0.0445	0.0425			0.0285	0.0285	120	0.0375	0.0375	0.0435	0.0415	0.0205	0.0185	0.0245	0.0265
	124	0.0525	0.0505	0.0545	0.0645	0.0605	0.0575	0.0615	0.0695	124	0.0415	0.0355	0.0385	0.0415	0.0295	0.0415	0.0335	0.0375	124	0.0345	0.0325	0.0295	0.0365	0.0275	0.0255	0.0255	0.0295	124	0.0305	0.0285	0.0445	0.0425			0.0285	0.0285	124	0.0375	0.0385	0.0435	0.0385	0.0205	0.0185	0.0245	0.0265
	128	0.054	0.051	0.056	0.066	0.062	0.059	0.063	0.071	128	0.041	0.036	0.041	0.042	0.032	0.043	0.034	0.039	128	0.036	0.034	0.03	0.036	0.027	0.026	0.026	0.03	128	0.033	0.03	0.045	0.045			0.029	0.028	128	0.039	0.039	0.047	0.043	0.022	0.019	0.025	0.026
	132	0.05475	0.05275	0.05675	0.06775	0.06275	0.05975	0.06475	0.07275	132	0.04275	0.03675	0.04175	0.04175	0.03275	0.04375	0.03475	0.03875	132	0.03675	0.03275	0.03075	0.03675	0.02775	0.02675	0.02675	0.02975	132	0.03375	0.02975	0.04475	0.04575			0.02875	0.02775	132	0.03875	0.04075	0.04675	0.03975	0.02075	0.01875	0.02475	0.02675
	136	0.0555	0.0535	0.0585	0.0685	0.0655	0.0605	0.0665	0.0735	136	0.0435	0.0365	0.0415	0.0415	0.0325	0.0425	0.0355	0.0395	136	0.0375	0.0335	0.0305	0.0365	0.0285	0.0265	0.0265	0.0295	136	0.0335	0.0295	0.0445	0.0445			0.0285	0.0285	136	0.0385	0.0405	0.0465	0.0465	0.0215	0.0185	0.0245	0.0265
	140	0.05825	0.05525	0.05825	0.06825	0.06625	0.06125	0.06725	0.07325	140	0.04425	0.03725	0.04125	0.04225	0.03225	0.04425	0.03425	0.03925	140	0.03625	0.03425	0.03025	0.03625	0.02825	0.02725	0.02625	0.02925	140	0.03325	0.02925	0.04525	0.04425			0.02825	0.02825	140	0.03925	0.04025	0.04625	0.04525	0.02125	0.02025	0.02425	0.02625
	144	0.05975	0.05575	0.06075	0.07075	0.06775	0.06475	0.06775	0.07475	144	0.04475	0.03775	0.04175	0.04275	0.03375	0.04375	0.03575	0.04075	144	0.03775	0.03475	0.03075	0.03775	0.03075	0.02675	0.02675	0.03175	144	0.03375	0.02975	0.04675	0.04475			0.02875	0.02875	144	0.03975	0.04075	0.04675	0.04275	0.02175	0.01875	0.02475	0.02675
	148	0.06025	0.05825	0.06125	0.07025	0.06825	0.06525	0.07025	0.07625	148	0.04425	0.03725	0.04225	0.04425	0.03325	0.04525	0.03525	0.04025	148	0.03825	0.03425	0.03125	0.03725	0.03025	0.02725	0.02725	0.03125	148	0.03325	0.03025	0.04625	0.04425			0.02825	0.02825	148	0.04025	0.04025	0.04625	0.04625	0.02125	0.01825	0.02425	0.02625
	152	0.06125	0.05925	0.06325	0.07225	0.07125	0.06625	0.07125	0.07725	152	0.04525	0.03825	0.04225	0.04325	0.03325	0.04425	0.03525	0.04025	152	0.03725	0.03525	0.03025	0.03725	0.02925	0.02725	0.02725	0.03025	152	0.03325	0.02925	0.04525	0.04425			0.02925	0.02825	152	0.04025	0.04025	0.04625	0.04125	0.02025	0.01725	0.02525	0.02725
	156	0.0615	0.0605	0.0655	0.0735	0.0715	0.0665	0.0725	0.0765	156	0.0445	0.0385	0.0435	0.0425	0.0345	0.0455	0.0355	0.0415	156	0.0365	0.0355	0.0315	0.0375	0.0285	0.0265	0.0275	0.0305	156	0.0335	0.0305	0.0455	0.0445			0.0295	0.0285	156	0.0405	0.0415	0.0475	0.0405	0.0205	0.0175	0.0245	0.0265
	160	0.06225	0.06125	0.06425	0.07425	0.07325	0.06725	0.07225	0.07925	160	0.04525	0.03825	0.04425	0.04425	0.03325	0.04525	0.03625	0.04125	160	0.03625	0.03625	0.03125	0.03825	0.02925	0.02825	0.02825	0.03225	160	0.03325	0.03025	0.04525	0.04625			0.02925	0.02825	160	0.04125	0.04225	0.04825	0.04225	0.02125	0.01725	0.02425	0.02625
	164	0.0635	0.0625	0.0665	0.0765	0.0735	0.0695	0.0735	0.0795	164	0.0455	0.0395	0.0445	0.0455	0.0335	0.0455	0.0365	0.0415	164	0.0365	0.0355	0.0315	0.0385	0.0295	0.0275	0.0275	0.0315	164	0.0335	0.0305	0.0465	0.0455			0.0295	0.0285	164	0.0415	0.0425	0.0495	0.0455	0.0205	0.0175	0.0255	0.0275
	168	0.06675	0.06375	0.06875	0.07875	0.07675	0.07175	0.07675	0.08275	168	0.04575	0.03775	0.04475	0.04475	0.03375	0.04675	0.03675	0.04175	168	0.03675	0.03675	0.03175	0.03875	0.02975	0.02875	0.02775	0.03175	168	0.03475	0.02975	0.04575	0.04675			0.02975	0.02875	168	0.04175	0.04275	0.04875	0.04375	0.02075	0.01775	0.02475	0.02775
	172	0.06825	0.06525	0.06925	0.08125	0.08025	0.07225	0.07925	0.08225	172	0.04625	0.04025	0.04625	0.04425	0.03525	0.04825	0.03725	0.04325	172	0.03825	0.03825	0.03225	0.03925	0.02925	0.02825	0.02825	0.03225	172	0.03525	0.03225	0.04825	0.04725			0.03025	0.02925	172	0.04325	0.04425	0.05025	0.04625	0.02125	0.01825	0.02525	0.02725
	176	0.06875	0.06775	0.07175	0.08175	0.08075	0.07375	0.07975	0.08975	176	0.04775	0.04075	0.04675	0.04575	0.03575	0.04975	0.03775	0.04175	176	0.03875	0.03875	0.03275	0.03875	0.02975	0.02875	0.02975	0.03275	176	0.03475	0.03175	0.04875	0.04775			0.02975	0.02875	176	0.04375	0.04475	0.04975	0.04775	0.02175	0.01875	0.02475	0.02675
	180	0.0715	0.0695	0.0725	0.0835	0.0815	0.0765	0.0815	0.0905	180	0.0475	0.0405	0.0485	0.0475	0.0365	0.0495	0.0375	0.0435	180	0.0395	0.0385	0.0335	0.0395	0.0305	0.0295	0.0285	0.0325	180	0.0365	0.0325	0.0495	0.0485			0.0295	0.0275	180	0.0435	0.0455	0.0515	0.0485	0.0225	0.0185	0.0245	0.0265
	184	0.07175	0.07075	0.07475	0.08475	0.08475	0.07875	0.08475	0.09075	184	0.04775	0.04175	0.04775	0.04775	0.03775	0.04975	0.03875	0.04475	184	0.04075	0.03775	0.03375	0.03975	0.03175	0.03075	0.02975	0.03275	184	0.03775	0.03275	0.04975	0.04875			0.02975	0.02775	184	0.04475	0.04675	0.05175	0.04875	0.02275	0.01875	0.02475	0.02775
	192	0.077	0.078	0.078	0.09	0.096	0.086	0.091	0.094	192	0.053	0.046	0.054	0.051	0.041	0.057	0.043	0.049	192	0.045	0.043	0.038	0.044	0.035	0.036	0.031	0.036	192	0.042	0.036	0.055	0.054			0.032	0.031	192	0.053	0.054	0.059	0.055	0.025	0.024	0.028	0.031
	196	0.079	0.079	0.081	0.09	0.097	0.088	0.092	0.095	196	0.057	0.047	0.054	0.052	0.041	0.056	0.042	0.049	196	0.046	0.043	0.038	0.044	0.035	0.036	0.032	0.036	196	0.043	0.036	0.055	0.054	0.023	0.025	0.032	0.032	196	0.052	0.054	0.059	0.055	0.025	0.024	0.028	0.031
	200	0.08	0.08	0.082	0.091	0.099	0.091	0.094	0.101	200	0.056	0.048	0.055	0.052	0.04	0.057	0.042	0.049	200	0.045	0.043	0.038	0.044	0.035	0.036	0.032	0.036	200	0.043	0.036	0.056	0.053	0.023	0.025	0.032	0.032	200	0.053	0.055	0.06	0.056	0.025	0.023	0.027	0.03
	204	0.0815	0.0835	0.0845	0.0935	0.1015	0.0915	0.0955	0.1025	204	0.0555	0.0475	0.0555	0.0525	0.0415	0.0565	0.0435	0.0505	204	0.0445	0.0435	0.0395	0.0445	0.0355	0.0365	0.0325	0.0365	204	0.0425	0.0375	0.0565	0.0545	0.0235	0.0255	0.0325	0.0325	204	0.0535	0.0555	0.0605	0.0575	0.0255	0.0235	0.0285	0.0315
	208	0.084	0.085	0.085	0.096	0.103	0.093	0.098	0.099	208	0.054	0.047	0.056	0.053	0.043	0.059	0.044	0.051	208	0.044	0.045	0.039	0.044	0.036	0.036	0.032	0.037	208	0.042	0.036	0.057	0.056	0.023	0.025	0.032	0.032	208	0.053	0.056	0.061	0.057	0.025	0.023	0.027	0.03
	212	0.085	0.086	0.088	0.097	0.104	0.095	0.1	0.101	212	0.056	0.048	0.056	0.053	0.043	0.058	0.045	0.051	212	0.046	0.046	0.04	0.045	0.036	0.038	0.033	0.037	212	0.044	0.037	0.057	0.056	0.023	0.026	0.033	0.032	212	0.054	0.055	0.06	0.057	0.025	0.023	0.027	0.03
	216	0.08875	0.08675	0.08775	0.09875	0.10675	0.09675	0.10175	0.10675	216	0.05675	0.04875	0.05575	0.05475	0.04375	0.05775	0.04475	0.05175	216	0.04675	0.04575	0.03975	0.04475	0.03575	0.03875	0.03275	0.03775	216	0.04375	0.03675	0.05675	0.05775	0.02275	0.02575	0.03275	0.03075	216	0.05375	0.05475	0.06075	0.05775	0.02375	0.02275	0.02875	0.03075
	220	0.09025	0.09025	0.09125	0.10125	0.10925	0.10025	0.10225	0.10525	220	0.05625	0.04925	0.05725	0.05325	0.04325	0.05825	0.04525	0.05125	220	0.04825	0.04625	0.03925	0.04625	0.03625	0.03725	0.03225	0.03825	220	0.04525	0.03825	0.05725	0.05725	0.02325	0.02625	0.03325	0.03225	220	0.05525	0.05625	0.06125	0.05925	0.02525	0.02325	0.02925	0.03125
	224	0.09125	0.09025	0.09225	0.10225	0.11225	0.10225	0.10825	0.10825	224	0.05725	0.05025	0.05725	0.05525	0.04425	0.05925	0.04525	0.05225	224	0.04725	0.04525	0.04025	0.04625	0.03625	0.03625	0.03325	0.03825	224	0.04425	0.03925	0.05825	0.05725	0.02325	0.02625	0.03425	0.03225	224	0.05525	0.05625	0.06125	0.05825	0.02525	0.02325	0.02825	0.03125
	228	0.093	0.093	0.094	0.105	0.115	0.106	0.109	0.111	228	0.058	0.05	0.057	0.056	0.045	0.06	0.046	0.053	228	0.046	0.049	0.041	0.047	0.036	0.037	0.033	0.038	228	0.044	0.04	0.059	0.059	0.023	0.026	0.033	0.032	228	0.055	0.056	0.062	0.06	0.024	0.024	0.028	0.031
	232	0.09525	0.09625	0.09625	0.10625	0.11725	0.10725	0.10925	0.11025	232	0.05825	0.05125	0.05825	0.05625	0.04625	0.05925	0.04625	0.05325	232	0.04625	0.04625	0.04125	0.04725	0.03625	0.03825	0.03325	0.03825	232	0.04325	0.03925	0.05825	0.05825	0.02325	0.02625	0.03325	0.03225	232	0.05625	0.05625	0.06325	0.05925	0.02525	0.02425	0.02825	0.03025
	236	0.09625	0.09625	0.09825	0.10925	0.11825	0.10725	0.11425	0.11225	236	0.05825	0.05125	0.05925	0.05725	0.04625	0.06025	0.04725	0.05525	236	0.04725	0.04725	0.04125	0.04725	0.03725	0.03825	0.03425	0.03825	236	0.04525	0.04025	0.05925	0.05825	0.02325	0.02625	0.03325	0.03225	236	0.05525	0.05825	0.06425	0.05925	0.02525	0.02425	0.02725	0.03025
	240	0.099	0.098	0.102	0.11	0.121	0.11	0.115	0.115	240	0.059	0.052	0.06	0.058	0.047	0.06	0.048	0.056	240	0.047	0.048	0.041	0.047	0.037	0.039	0.035	0.039	240	0.045	0.04	0.06	0.059	0.023	0.026	0.033	0.032	240	0.055	0.057	0.064	0.06	0.025	0.023	0.028	0.03
	244	0.1	0.102	0.103	0.112	0.124	0.113	0.119	0.12	244	0.059	0.053	0.059	0.058	0.047	0.059	0.048	0.055	244	0.048	0.048	0.041	0.047	0.038	0.039	0.034	0.04	244	0.046	0.04	0.061	0.06	0.023	0.026	0.034	0.032	244	0.056	0.058	0.063	0.06	0.025	0.024	0.028	0.031
	248	0.10275	0.10275	0.10375	0.11275	0.12575	0.11575	0.11975	0.11875	248	0.05975	0.05275	0.06075	0.05875	0.04775	0.05875	0.04775	0.05575	248	0.04675	0.04775	0.04175	0.04875	0.03775	0.03975	0.03475	0.03975	248	0.04675	0.04075	0.06075	0.06075	0.02375	0.02675	0.03375	0.03175	248	0.05675	0.05775	0.06475	0.06275	0.02475	0.02375	0.02875	0.02975
	252	0.10325	0.10525	0.10725	0.11625	0.12825	0.11725	0.12325	0.12125	252	0.06125	0.05425	0.06125	0.06025	0.04825	0.06025	0.04925	0.05725	252	0.04825	0.05025	0.04325	0.05025	0.03825	0.04025	0.03525	0.04025	252	0.04725	0.04125	0.06125	0.06125	0.02325	0.02625	0.03425	0.03225	252	0.05625	0.05825	0.06425	0.06325	0.02425	0.02425	0.02825	0.03025
	256	0.10525	0.10725	0.10825	0.11725	0.13125	0.12225	0.12725	0.12725	256	0.06425	0.05425	0.06125	0.05925	0.04925	0.06025	0.04925	0.05725	256	0.04825	0.05025	0.04325	0.04925	0.03825	0.04125	0.03625	0.04025	256	0.04725	0.04125	0.06225	0.06225	0.02325	0.02625	0.03425	0.03225	256	0.05725	0.05825	0.06425	0.06125	0.02425	0.02325	0.02825	0.03125
	260	0.108	0.111	0.11	0.119	0.135	0.124	0.128	0.127	260	0.06	0.055	0.062	0.06	0.05	0.059	0.051	0.059	260	0.049	0.05	0.043	0.048	0.039	0.04	0.035	0.04	260	0.048	0.043	0.062	0.063	0.023	0.026	0.034	0.032	260	0.058	0.059	0.065	0.062	0.024	0.024	0.028	0.03
	264	0.111	0.111	0.113	0.122	0.136	0.126	0.132	0.127	264	0.062	0.056	0.064	0.061	0.05	0.061	0.05	0.058	264	0.049	0.052	0.045	0.049	0.039	0.04	0.036	0.04	264	0.048	0.043	0.062	0.062	0.024	0.026	0.034	0.032	264	0.057	0.059	0.065	0.064	0.024	0.024	0.027	0.03
	268	0.11125	0.11425	0.11425	0.12425	0.13925	0.12925	0.13425	0.12825	268	0.06225	0.05625	0.06425	0.06125	0.04925	0.06125	0.05125	0.05825	268	0.05025	0.05225	0.04525	0.04925	0.03925	0.04225	0.03625	0.04025	268	0.04925	0.04425	0.06225	0.06325	0.02425	0.02625	0.03425	0.03225	268	0.05925	0.06025	0.06525	0.06525	0.02525	0.02325	0.02825	0.03125
	272	0.11125	0.11525	0.11725	0.12525	0.14225	0.13025	0.13525	0.13125	272	0.06225	0.05725	0.06425	0.06125	0.05025	0.06125	0.05225	0.06025	272	0.05125	0.05225	0.04525	0.05025	0.04025	0.04125	0.03725	0.04125	272	0.04925	0.04425	0.06325	0.06325	0.02325	0.02625	0.03425	0.03225	272	0.05825	0.05925	0.06725	0.06425	0.02525	0.02425	0.02825	0.03125
	276	0.11375	0.11675	0.11975	0.12775	0.14575	0.13275	0.13975	0.13375	276	0.06275	0.05775	0.06475	0.06275	0.05075	0.06175	0.05175	0.05975	276	0.05075	0.05275	0.04575	0.05075	0.04075	0.04175	0.03675	0.04175	276	0.04875	0.04375	0.06275	0.06475	0.02375	0.02675	0.03375	0.03175	276	0.05875	0.05975	0.06575	0.06575	0.02475	0.02275	0.02775	0.03075
	280	0.11675	0.11975	0.12275	0.13075	0.14975	0.13775	0.14475	0.13675	280	0.06375	0.05775	0.06475	0.06275	0.05075	0.06175	0.05275	0.06075	280	0.05175	0.05275	0.04575	0.05175	0.04175	0.04275	0.03775	0.04275	280	0.04975	0.04575	0.06375	0.06475	0.02375	0.02675	0.03475	0.03175	280	0.06075	0.06075	0.06575	0.06875	0.02475	0.02275	0.02775	0.03075
	284	0.12025	0.12225	0.12625	0.13425	0.15225	0.14025	0.14825	0.14125	284	0.06425	0.05825	0.06525	0.06325	0.05125	0.06325	0.05325	0.06025	284	0.05125	0.05325	0.04525	0.05225	0.04325	0.04325	0.03925	0.04325	284	0.05025	0.04525	0.06325	0.06525	0.02425	0.02725	0.03425	0.03125	284	0.06025	0.06125	0.06825	0.06925	0.02525	0.02325	0.02825	0.03125
	288	0.12175	0.12475	0.12675	0.13475	0.15475	0.14375	0.15075	0.14375	288	0.06375	0.05775	0.06575	0.06375	0.05175	0.06275	0.05275	0.06175	288	0.05275	0.05275	0.04675	0.05075	0.04275	0.04275	0.03875	0.04275	288	0.05075	0.04575	0.06375	0.06475	0.02375	0.02775	0.03475	0.03175	288	0.06075	0.06175	0.06675	0.06875	0.02475	0.02275	0.02875	0.03075
	292	0.12275	0.12775	0.12975	0.13575	0.15775	0.14375	0.15275	0.14675	292	0.06475	0.05875	0.06575	0.06375	0.05275	0.06375	0.05375	0.06275	292	0.05275	0.05475	0.04775	0.05275	0.04175	0.04475	0.03875	0.04375	292	0.05075	0.04575	0.06375	0.06575	0.02375	0.02675	0.03475	0.03175	292	0.06075	0.06175	0.06875	0.06675	0.02475	0.02375	0.02775	0.03075
	296	0.1275	0.1315	0.1315	0.1405	0.1615	0.1495	0.1595	0.1485	296	0.0665	0.0605	0.0675	0.0655	0.0535	0.0645	0.0555	0.0645	296	0.0535	0.0555	0.0495	0.0535	0.0435	0.0465	0.0395	0.0445	296	0.0515	0.0475	0.0655	0.0665	0.0245	0.0275	0.0345	0.0325	296	0.0625	0.0635	0.0695	0.0715	0.0255	0.0245	0.0285	0.0315
	300	0.129	0.133	0.133	0.143	0.165	0.154	0.163	0.153	300	0.066	0.06	0.068	0.066	0.054	0.066	0.056	0.063	300	0.053	0.056	0.048	0.053	0.044	0.046	0.04	0.045	300	0.052	0.047	0.065	0.067	0.024	0.028	0.034	0.032	300	0.063	0.064	0.07	0.072	0.025	0.024	0.028	0.031
	304	0.131	0.135	0.135	0.144	0.167	0.155	0.164	0.158	304	0.068	0.061	0.068	0.067	0.056	0.066	0.057	0.066	304	0.054	0.055	0.049	0.053	0.043	0.046	0.04	0.045	304	0.052	0.048	0.066	0.067	0.025	0.028	0.035	0.032	304	0.065	0.065	0.07	0.067	0.025	0.023	0.028	0.031
	308	0.1335	0.1365	0.1385	0.1495	0.1725	0.1595	0.1685	0.1585	308	0.0675	0.0625	0.0695	0.0675	0.0565	0.0675	0.0595	0.0655	308	0.0555	0.0565	0.0505	0.0535	0.0435	0.0455	0.0405	0.0465	308	0.0525	0.0485	0.0675	0.0675	0.0245	0.0275	0.0355	0.0325	308	0.0635	0.0655	0.0705	0.0685	0.0255	0.0235	0.0285	0.0315
	312	0.13625	0.14025	0.14125	0.15325	0.17225	0.16125	0.16925	0.16225	312	0.06925	0.06325	0.07025	0.06725	0.05725	0.06725	0.05925	0.06625	312	0.05525	0.05625	0.05125	0.05425	0.04425	0.04625	0.04125	0.04625	312	0.05325	0.04925	0.06825	0.06825	0.02425	0.02725	0.03525	0.03225	312	0.06425	0.06625	0.07225	0.06925	0.02525	0.02225	0.02825	0.03125
	316	0.1395	0.1435	0.1455	0.1555	0.1745	0.1625	0.1705	0.1635	316	0.0695	0.0635	0.0715	0.0685	0.0575	0.0685	0.0595	0.0675	316	0.0565	0.0585	0.0525	0.0565	0.0465	0.0465	0.0425	0.0465	316	0.0545	0.0495	0.0685	0.0685	0.0245	0.0285	0.0355	0.0325	316	0.0655	0.0675	0.0725	0.0745	0.0255	0.0225	0.0285	0.0315
	320	0.14225	0.14725	0.14725	0.15725	0.18025	0.16925	0.17725	0.16525	320	0.07025	0.06325	0.07125	0.06925	0.05825	0.06925	0.06025	0.06825	320	0.05625	0.05725	0.05225	0.05725	0.04625	0.04825	0.04225	0.04725	320	0.05425	0.05025	0.06925	0.06925	0.02425	0.02725	0.03525	0.03225	320	0.06525	0.06625	0.07225	0.07025	0.02525	0.02325	0.02825	0.03225
	324	0.142	0.149	0.152	0.162	0.181	0.169	0.179	0.169	324	0.073	0.064	0.072	0.071	0.058	0.07	0.062	0.069	324	0.056	0.057	0.053	0.057	0.047	0.048	0.042	0.048	324	0.055	0.049	0.069	0.069	0.025	0.028	0.035	0.032	324	0.066	0.067	0.074	0.076	0.025	0.023	0.028	0.032
	328	0.14925	0.15425	0.15425	0.16425	0.18525	0.17225	0.18325	0.17325	328	0.07025	0.06625	0.07225	0.07025	0.05925	0.07025	0.06125	0.06925	328	0.05725	0.05825	0.05425	0.05825	0.04725	0.04825	0.04325	0.04825	328	0.05525	0.05025	0.06925	0.06925	0.02425	0.02825	0.03525	0.03225	328	0.06725	0.06825	0.07425	0.07325	0.02625	0.02325	0.02825	0.03125
	332	0.15375	0.15775	0.15775	0.16575	0.19075	0.17675	0.18575	0.17775	332	0.07175	0.06675	0.07275	0.07075	0.05975	0.07175	0.06175	0.06975	332	0.05775	0.05875	0.05375	0.05875	0.04675	0.04875	0.04275	0.04775	332	0.05475	0.05075	0.07075	0.06875	0.02475	0.02775	0.03475	0.03175	332	0.06675	0.06775	0.07475	0.07275	0.02575	0.02275	0.02875	0.03175
	336	0.157	0.161	0.162	0.168	0.195	0.182	0.191	0.176	336	0.072	0.068	0.074	0.072	0.061	0.073	0.063	0.071	336	0.058	0.059	0.055	0.059	0.047	0.049	0.043	0.049	336	0.056	0.052	0.071	0.07	0.024	0.028	0.036	0.032	336	0.067	0.069	0.075	0.078	0.026	0.023	0.029	0.032
	340	0.15975	0.16475	0.16375	0.17175	0.19675	0.18175	0.19275	0.18075	340	0.07275	0.06775	0.07475	0.07275	0.06175	0.07375	0.06375	0.07175	340	0.05875	0.05875	0.05475	0.05975	0.04775	0.04975	0.04375	0.05075	340	0.05775	0.05175	0.07075	0.07075	0.02475	0.02875	0.03575	0.03175	340	0.06875	0.06975	0.07575	0.07875	0.02575	0.02275	0.02775	0.03175
	344	0.16175	0.16775	0.16875	0.17575	0.20075	0.18575	0.19675	0.18275	344	0.07375	0.06875	0.07475	0.07375	0.06175	0.07375	0.06375	0.07275	344	0.05875	0.05875	0.05575	0.06075	0.04775	0.04975	0.04475	0.05075	344	0.05775	0.05275	0.07075	0.07075	0.02475	0.02875	0.03475	0.03175	344	0.06775	0.06975	0.07675	0.07675	0.02575	0.02275	0.02875	0.03175
	348	0.16575	0.17275	0.17175	0.17975	0.20375	0.18975	0.19775	0.18575	348	0.07575	0.06875	0.07575	0.07375	0.06375	0.07375	0.06475	0.07175	348	0.05975	0.05975	0.05575	0.06075	0.04875	0.05075	0.04475	0.05075	348	0.05875	0.05375	0.07075	0.07175	0.02475	0.02875	0.03575	0.03175	348	0.06975	0.07175	0.07675	0.07675	0.02575	0.02275	0.02875	0.03175
	352	0.165	0.172	0.175	0.182	0.208	0.191	0.2	0.188	352	0.075	0.07	0.077	0.074	0.064	0.076	0.066	0.073	352	0.06	0.06	0.057	0.061	0.05	0.051	0.046	0.051	352	0.059	0.053	0.073	0.072	0.025	0.029	0.036	0.032	352	0.07	0.071	0.077	0.08	0.026	0.023	0.029	0.032
	356	0.16875	0.17675	0.17875	0.18575	0.21075	0.19775	0.20475	0.19275	356	0.07675	0.07175	0.07775	0.07575	0.06375	0.07575	0.06675	0.07375	356	0.06175	0.05975	0.05875	0.06175	0.05075	0.05075	0.04675	0.05175	356	0.05875	0.05375	0.07175	0.07175	0.02475	0.02875	0.03575	0.03375	356	0.07075	0.07275	0.07875	0.07875	0.02575	0.02275	0.02975	0.03175
	360	0.17	0.176	0.182	0.19	0.216	0.199	0.208	0.195	360	0.077	0.071	0.079	0.076	0.066	0.078	0.068	0.075	360	0.062	0.061	0.058	0.063	0.051	0.052	0.046	0.052	360	0.061	0.054	0.073	0.073	0.025	0.029	0.036	0.033	360	0.072	0.074	0.079	0.076	0.026	0.024	0.029	0.033
	364	0.174	0.179	0.182	0.193	0.218	0.202	0.211	0.2	364	0.078	0.072	0.078	0.076	0.065	0.078	0.068	0.074	364	0.062	0.06	0.058	0.062	0.051	0.052	0.047	0.051	364	0.06	0.054	0.073	0.073	0.026	0.029	0.036	0.033	364	0.073	0.073	0.079	0.074	0.026	0.024	0.029	0.032
	368	0.176	0.184	0.187	0.198	0.221	0.206	0.214	0.202	368	0.077	0.073	0.08	0.076	0.067	0.081	0.069	0.076	368	0.062	0.06	0.059	0.062	0.052	0.053	0.047	0.053	368	0.061	0.056	0.074	0.073	0.026	0.028	0.036	0.033	368	0.073	0.075	0.08	0.078	0.026	0.025	0.029	0.033
	372	0.17575	0.18575	0.18975	0.20175	0.22375	0.20875	0.21775	0.20575	372	0.07875	0.07375	0.07975	0.07675	0.06675	0.08075	0.06975	0.07675	372	0.06375	0.06275	0.05975	0.06275	0.05175	0.05375	0.04775	0.05375	372	0.06175	0.05675	0.07375	0.07475	0.02575	0.02875	0.03575	0.03275	372	0.07575	0.07575	0.08075	0.08275	0.02575	0.02375	0.03075	0.03275
	376	0.183	0.192	0.193	0.199	0.231	0.22	0.224	0.214	376	0.079	0.075	0.082	0.079	0.068	0.081	0.071	0.077	376	0.064	0.062	0.06	0.063	0.052	0.053	0.048	0.054	376	0.063	0.057	0.075	0.075	0.025	0.029	0.036	0.032	376	0.075	0.075	0.082	0.077	0.026	0.023	0.03	0.033
	380	0.19	0.2	0.2	0.205	0.241	0.227	0.23	0.216	380	0.081	0.074	0.082	0.08	0.069	0.083	0.071	0.078	380	0.065	0.063	0.06	0.064	0.053	0.054	0.049	0.054	380	0.063	0.057	0.076	0.075	0.026	0.029	0.036	0.032	380	0.075	0.076	0.083	0.076	0.026	0.024	0.029	0.033
	384	0.188	0.198	0.2	0.205	0.238	0.225	0.231	0.219	384	0.081	0.075	0.082	0.079	0.069	0.082	0.072	0.079	384	0.066	0.063	0.06	0.064	0.053	0.055	0.049	0.055	384	0.063	0.058	0.076	0.076	0.026	0.029	0.036	0.033	384	0.076	0.077	0.082	0.076	0.026	0.024	0.029	0.033
	388	0.19175	0.20075	0.20475	0.20975	0.24475	0.22875	0.23675	0.22375	388	0.07975	0.07475	0.08275	0.07975	0.07075	0.08175	0.07375	0.07875	388	0.06575	0.06375	0.06075	0.06475	0.05275	0.05475	0.04975	0.05475	388	0.06475	0.05875	0.07675	0.07675	0.02575	0.02875	0.03575	0.03175	388	0.07475	0.07675	0.08275	0.07675	0.02675	0.02375	0.02975	0.03275
	392	0.2	0.208	0.209	0.214	0.255	0.243	0.245	0.23	392	0.083	0.076	0.084	0.08	0.071	0.084	0.073	0.081	392	0.068	0.064	0.061	0.066	0.053	0.055	0.049	0.055	392	0.066	0.059	0.077	0.077	0.025	0.029	0.037	0.034	392	0.076	0.078	0.084	0.077	0.026	0.026	0.029	0.033
	396	0.19825	0.20525	0.20825	0.21325	0.25425	0.23825	0.24225	0.22525	396	0.08325	0.07725	0.08325	0.08125	0.07225	0.08425	0.07525	0.08125	396	0.06925	0.06525	0.06325	0.06625	0.05425	0.05625	0.05125	0.05625	396	0.06525	0.06025	0.07825	0.07725	0.02625	0.02925	0.03725	0.03325	396	0.07825	0.07825	0.08225	0.07825	0.02625	0.02425	0.02925	0.03325
	400	0.20125	0.21125	0.21225	0.21825	0.25825	0.24325	0.24925	0.23625	400	0.08325	0.07525	0.08425	0.08225	0.07325	0.08425	0.07525	0.08225	400	0.06825	0.06825	0.06325	0.06725	0.05525	0.05725	0.05025	0.05725	400	0.06725	0.06025	0.07925	0.07825	0.02625	0.03025	0.03725	0.03325	400	0.07825	0.08025	0.08625	0.08025	0.02625	0.02525	0.03025	0.03425
	404	0.20475	0.21275	0.21475	0.21875	0.26375	0.24975	0.25575	0.23875	404	0.08375	0.07675	0.08475	0.08175	0.07375	0.08475	0.07575	0.08275	404	0.06975	0.06675	0.06375	0.06775	0.05475	0.05675	0.05175	0.05675	404	0.06775	0.05975	0.07975	0.07775	0.02575	0.02875	0.03675	0.03275	404	0.07775	0.07875	0.08675	0.07975	0.02675	0.02375	0.02975	0.03275
	408	0.20675	0.21575	0.21775	0.22475	0.25875	0.24575	0.25375	0.24175	408	0.08475	0.07775	0.08575	0.08275	0.07275	0.08475	0.07675	0.08175	408	0.07075	0.06675	0.06475	0.06775	0.05575	0.05775	0.05175	0.05775	408	0.06675	0.05975	0.07975	0.07775	0.02575	0.02975	0.03675	0.03175	408	0.07775	0.07975	0.08575	0.08475	0.02775	0.02375	0.02975	0.03375
	412	0.21425	0.22225	0.22625	0.22825	0.26925	0.25125	0.26025	0.24625	412	0.08525	0.07925	0.08725	0.08325	0.07525	0.08725	0.07825	0.08325	412	0.07125	0.06725	0.06525	0.07025	0.05625	0.05925	0.05325	0.05825	412	0.06825	0.06225	0.08125	0.07925	0.02725	0.03125	0.03725	0.03325	412	0.08025	0.08125	0.08825	0.08425	0.02825	0.02325	0.03025	0.03425
	416	0.221	0.226	0.231	0.229	0.269	0.254	0.266	0.255	416	0.086	0.08	0.087	0.083	0.074	0.088	0.078	0.083	416	0.071	0.068	0.066	0.071	0.057	0.059	0.054	0.059	416	0.069	0.062	0.082	0.081	0.027	0.031	0.038	0.033	416	0.081	0.082	0.088	0.082	0.028	0.023	0.03	0.034
	420	0.21475	0.22375	0.22975	0.23175	0.26475	0.24975	0.26075	0.25075	420	0.08575	0.08075	0.08675	0.08375	0.07475	0.08675	0.07875	0.08375	420	0.07175	0.06975	0.06675	0.07075	0.05775	0.05975	0.05375	0.06075	420	0.06875	0.06375	0.08275	0.08175	0.02675	0.03175	0.03775	0.03275	420	0.08075	0.08375	0.08975	0.08275	0.02775	0.02375	0.03075	0.03375
	424	0.22175	0.23075	0.23675	0.23475	0.26875	0.25675	0.26775	0.25875	424	0.08775	0.08075	0.08875	0.08475	0.07575	0.08775	0.07975	0.08475	424	0.07175	0.06975	0.06775	0.07175	0.05775	0.05975	0.05475	0.05975	424	0.06975	0.06375	0.08375	0.08275	0.02675	0.03175	0.03775	0.03275	424	0.08075	0.08275	0.08875	0.09075	0.02775	0.02275	0.02975	0.03375
	428	0.22275	0.23575	0.24175	0.23375	0.27675	0.26275	0.27175	0.26675	428	0.08875	0.08175	0.08875	0.08675	0.07675	0.08875	0.08175	0.08575	428	0.07375	0.07075	0.06775	0.07275	0.05875	0.06075	0.05475	0.06075	428	0.07075	0.06375	0.08475	0.08275	0.02675	0.03175	0.03775	0.03375	428	0.08075	0.08275	0.08975	0.08375	0.02775	0.02375	0.03075	0.03375
	432	0.228	0.237	0.243	0.236	0.277	0.265	0.276	0.267	432	0.089	0.083	0.09	0.086	0.077	0.09	0.083	0.086	432	0.074	0.073	0.069	0.072	0.06	0.062	0.056	0.061	432	0.071	0.065	0.085	0.083	0.027	0.031	0.038	0.034	432	0.082	0.085	0.09	0.088	0.028	0.023	0.03	0.034
	436	0.22975	0.23975	0.24575	0.23875	0.27975	0.26575	0.27775	0.27075	436	0.08875	0.08375	0.08875	0.08675	0.07875	0.09175	0.08175	0.08675	436	0.07475	0.07275	0.07075	0.07475	0.06075	0.06175	0.05575	0.06175	436	0.07175	0.06575	0.08475	0.08275	0.02675	0.03175	0.03775	0.03375	436	0.08275	0.08575	0.09075	0.08575	0.02875	0.02275	0.03075	0.03375
										440	0.08975	0.08375	0.09075	0.08675	0.08075	0.09175	0.08375	0.08775	440	0.07575	0.07275	0.07075	0.07475	0.06075	0.06275	0.05575	0.06175	440	0.07175	0.06575	0.08675	0.08475	0.02675	0.03175	0.03775	0.03375	440	0.08275	0.08475	0.09175	0.08575	0.02875	0.02375	0.03075	0.03375
										444	0.09025	0.08625	0.09025	0.08725	0.07925	0.09325	0.08425	0.08825	444	0.07625	0.07525	0.07225	0.07625	0.06225	0.06425	0.05725	0.06425	444	0.07325	0.06725	0.08625	0.08525	0.02725	0.03225	0.03825	0.03425	444	0.08525	0.08625	0.09425	0.09225	0.02925	0.02425	0.03125	0.03425
										448	0.09075	0.08575	0.09175	0.08775	0.07975	0.09275	0.08375	0.08975	448	0.07675	0.07375	0.07275	0.07575	0.06275	0.06375	0.05775	0.06375	448	0.07375	0.06675	0.08675	0.08475	0.02675	0.03175	0.03775	0.03375	448	0.08475	0.08675	0.09375	0.08975	0.02875	0.02375	0.03075	0.03475
										452	0.09175	0.08575	0.09375	0.08975	0.08075	0.09275	0.08575	0.09075	452	0.07875	0.07575	0.07375	0.07775	0.06275	0.06475	0.05875	0.06375	452	0.07475	0.06775	0.08675	0.08575	0.02675	0.03175	0.03875	0.03375	452	0.08675	0.08775	0.09375	0.09075	0.02875	0.02375	0.03075	0.03475
										456	0.09375	0.08675	0.09375	0.08975	0.08175	0.09375	0.08575	0.09075	456	0.07975	0.07875	0.07475	0.07775	0.06375	0.06475	0.05875	0.06575	456	0.07575	0.06875	0.08775	0.08475	0.02775	0.03175	0.03875	0.03475	456	0.08775	0.08975	0.09475	0.08775	0.02975	0.02475	0.03175	0.03475
										460	0.09275	0.08875	0.09375	0.08975	0.08275	0.09375	0.08675	0.08975	460	0.08075	0.07875	0.07675	0.07875	0.06475	0.06575	0.05975	0.06575	460	0.07575	0.06875	0.08875	0.08675	0.02775	0.03275	0.03775	0.03375	460	0.08675	0.09075	0.09675	0.09575	0.02975	0.02475	0.03175	0.03475
										464	0.094	0.089	0.096	0.09	0.083	0.094	0.088	0.09	464	0.082	0.079	0.077	0.081	0.066	0.066	0.06	0.066	464	0.076	0.068	0.09	0.087	0.028	0.033	0.038	0.034	464	0.088	0.091	0.098	0.092	0.03	0.025	0.033	0.035
										468	0.09425	0.08825	0.09525	0.09125	0.08425	0.09525	0.08825	0.09125	468	0.08225	0.08025	0.07625	0.08025	0.06725	0.06725	0.06225	0.06725	468	0.07725	0.06925	0.08925	0.08825	0.02825	0.03325	0.03825	0.03425	468	0.08725	0.09125	0.09825	0.09825	0.03025	0.02525	0.03225	0.03525
										472	0.0965	0.0895	0.0965	0.0925	0.0835	0.0965	0.0885	0.0925	472	0.0825	0.0805	0.0775	0.0805	0.0675	0.0675	0.0615	0.0685	472	0.0775	0.0695	0.0905	0.0885	0.0285	0.0335	0.0385	0.0335	472	0.0885	0.0905	0.0995	0.0925	0.0295	0.0245	0.0315	0.0345
										476	0.09675	0.09075	0.09775	0.09175	0.08375	0.09675	0.08875	0.09175	476	0.08475	0.08075	0.07875	0.08175	0.06775	0.06975	0.06275	0.06875	476	0.07875	0.07075	0.09075	0.08875	0.02875	0.03375	0.03875	0.03475	476	0.09075	0.09275	0.09875	0.09875	0.03075	0.02575	0.03175	0.03575
										480	0.09775	0.09175	0.09875	0.09275	0.08475	0.09675	0.08975	0.09275	480	0.08575	0.08175	0.07975	0.08275	0.06975	0.07075	0.06375	0.06975	480	0.07875	0.07175	0.09175	0.08975	0.02875	0.03275	0.03875	0.03475	480	0.09175	0.09275	0.09775	0.09375	0.03075	0.02575	0.03275	0.03475
										484	0.096	0.09	0.098	0.093	0.085	0.097	0.089	0.095	484	0.086	0.083	0.079	0.084	0.071	0.072	0.065	0.071	484	0.079	0.071	0.092	0.09	0.029	0.033	0.039	0.034	484	0.092	0.092	0.101	0.1	0.031	0.026	0.033	0.036
										488	0.09975	0.09375	0.09775	0.09575	0.08675	0.09775	0.09075	0.09375	488	0.08675	0.08375	0.08075	0.08275	0.07075	0.07175	0.06575	0.07175	488	0.07875	0.07275	0.09375	0.09075	0.02875	0.03375	0.03875	0.03475	488	0.09075	0.09375	0.10175	0.09475	0.03075	0.02575	0.03275	0.03575
										492	0.09775	0.09075	0.09775	0.09375	0.08575	0.09875	0.08975	0.09275	492	0.08675	0.08375	0.08175	0.08375	0.07175	0.07275	0.06675	0.07275	492	0.07875	0.07275	0.09275	0.09175	0.02875	0.03275	0.03875	0.03475	492	0.09075	0.09375	0.10275	0.09475	0.02975	0.02575	0.03275	0.03475
										496	0.09775	0.09175	0.09975	0.09675	0.08475	0.09775	0.08975	0.09375	496	0.08875	0.08575	0.08075	0.08475	0.07275	0.07275	0.06775	0.07275	496	0.08075	0.07175	0.09475	0.09175	0.02875	0.03375	0.03975	0.03475	496	0.09075	0.09375	0.10375	0.09475	0.03075	0.02575	0.03275	0.03575
										500	0.09875	0.09475	0.10075	0.09475	0.08675	0.09875	0.09175	0.09475	500	0.08975	0.08675	0.08375	0.08575	0.07275	0.07475	0.06875	0.07375	500	0.08175	0.07375	0.09575	0.09175	0.02875	0.03375	0.03975	0.03475	500	0.09275	0.09675	0.10475	0.09475	0.02975	0.02575	0.03275	0.03575
										504	0.102	0.096	0.103	0.098	0.087	0.102	0.093	0.096	504	0.091	0.088	0.086	0.088	0.074	0.077	0.069	0.075	504	0.082	0.074	0.095	0.094	0.029	0.034	0.04	0.035	504	0.092	0.097	0.105	0.098	0.031	0.027	0.033	0.036
										508	0.102	0.096	0.105	0.097	0.088	0.101	0.092	0.095	508	0.091	0.089	0.086	0.089	0.076	0.077	0.07	0.076	508	0.083	0.076	0.097	0.094	0.03	0.035	0.04	0.036	508	0.094	0.098	0.104	0.097	0.032	0.027	0.034	0.036
										512	0.10275	0.09775	0.10275	0.09775	0.08875	0.10075	0.09275	0.09475	512	0.09175	0.08875	0.08675	0.08875	0.07475	0.07775	0.07075	0.07575	512	0.08175	0.07575	0.09775	0.09375	0.02875	0.03475	0.03975	0.03575	512	0.09375	0.09675	0.10475	0.09775	0.03075	0.02675	0.03375	0.03575
										516	0.103	0.098	0.104	0.099	0.086	0.102	0.092	0.094	516	0.092	0.089	0.087	0.09	0.077	0.08	0.072	0.077	516	0.083	0.078	0.098	0.096	0.03	0.035	0.041	0.036	516	0.095	0.098	0.105	0.098	0.032	0.027	0.034	0.037
										520	0.10275	0.09675	0.10375	0.10075	0.08775	0.10275	0.09175	0.09575	520	0.09375	0.08975	0.08775	0.08975	0.07775	0.07875	0.07275	0.07775	520	0.08275	0.07475	0.09875	0.09475	0.02975	0.03475	0.04075	0.03575	520	0.09475	0.09675	0.10575	0.09575	0.03175	0.02675	0.03375	0.03675
										524	0.103	0.099	0.107	0.101	0.089	0.104	0.093	0.096	524	0.095	0.09	0.09	0.091	0.078	0.081	0.073	0.079	524	0.083	0.076	0.098	0.096	0.03	0.035	0.04	0.036	524	0.095	0.099	0.106	0.098	0.031	0.027	0.033	0.037
										528	0.105	0.1	0.107	0.101	0.087	0.105	0.092	0.095	528	0.096	0.092	0.089	0.094	0.079	0.081	0.074	0.08	528	0.084	0.076	0.1	0.096	0.03	0.036	0.041	0.037	528	0.096	0.098	0.107	0.098	0.032	0.028	0.034	0.037
										532	0.1035	0.0995	0.1065	0.1015	0.0895	0.1035	0.0935	0.0965	532	0.0975	0.0925	0.0905	0.0935	0.0795	0.0825	0.0745	0.0805	532	0.0855	0.0795	0.1005	0.0965	0.0305	0.0345	0.0405	0.0365	532	0.0965	0.0995	0.1075	0.0975	0.0305	0.0275	0.0325	0.0365
										536	0.10425	0.10125	0.10825	0.10525	0.09025	0.10525	0.09225	0.09525	536	0.09925	0.09225	0.09125	0.09225	0.08025	0.08325	0.07625	0.08025	536	0.08625	0.07925	0.10025	0.09725	0.03025	0.03525	0.04225	0.03725	536	0.09825	0.09825	0.10825	0.09925	0.03225	0.02825	0.03325	0.03725
																												540	0.08775	0.07875	0.10075	0.09675	0.03075	0.03575	0.04175	0.03675	540	0.09775	0.09975	0.10775	0.09875	0.03075	0.02775	0.03375	0.03675
																												544	0.088	0.08	0.103	0.098	0.031	0.036	0.042	0.037	544	0.099	0.099	0.108	0.098	0.032	0.028	0.034	0.037
																												548	0.087	0.079	0.102	0.099	0.031	0.036	0.042	0.037	548	0.101	0.1	0.108	0.1	0.031	0.028	0.035	0.038
																												552	0.08875	0.07975	0.10275	0.09975	0.03175	0.03575	0.04175	0.03675	552	0.09975	0.09975	0.10775	0.10275	0.03175	0.02875	0.03475	0.03775
																												556	0.08725	0.07825	0.10325	0.09825	0.03225	0.03625	0.04225	0.03725	556	0.10025	0.09925	0.11025	0.10125	0.03225	0.02925	0.03525	0.03725
																												560					0.033	0.037	0.042	0.037	560	0.1	0.101	0.11	0.104	0.032	0.029	0.035	0.038
																												564					0.03175	0.03675	0.04175	0.03775	564	0.09975	0.10175	0.10875	0.10775	0.03275	0.02975	0.03475	0.03775
																												568					0.03075	0.03675	0.04275	0.03775	568	0.09975	0.09975	0.10875	0.10075	0.03175	0.02975	0.03475	0.03775
																												572					0.03175	0.03675	0.04275	0.03775	572	0.09875	0.10075	0.10975	0.09975	0.03275	0.02975	0.03475	0.03775
																												576					0.03175	0.03675	0.04275	0.03775	576
																												580					0.03275	0.03775	0.04275	0.03775	580
																												584					0.03275	0.03775	0.04275	0.03775	584
																												588					0.03275	0.03775	0.04375	0.03875	588
																												592					0.03375	0.03775	0.04275	0.03875	592
																												596					0.034	0.038	0.044	0.039	596
																												600					0.03375	0.03875	0.04375	0.03875	600
																												604					0.03475	0.03875	0.04375	0.03875	604
																												608					0.03475	0.03875	0.04475	0.03975	608
																												612					0.03525	0.03925	0.04525	0.04025	612
																												616					0.03475	0.03875	0.04575	0.03975	616
																												620					0.03475	0.03875	0.04575	0.03975	620
																												624					0.03475	0.03975	0.04575	0.03975	624
																												628					0.03475	0.03975	0.04475	0.03975	628
																												632					0.03475	0.03975	0.04575	0.03975	632
																												636					0.03575	0.03975	0.04575	0.04075	636
																												640					0.036	0.04	0.046	0.041	640
																												644					0.036	0.041	0.047	0.042	644
																												648					0.03675	0.04075	0.04675	0.04175	648
																												652					0.03675	0.04075	0.04775	0.04175	652
																												656					0.037	0.041	0.048	0.042	656
																												660					0.03675	0.04175	0.04775	0.04275	660
																												664					0.03775	0.04175	0.04675	0.04175	664
																												668					0.038	0.042	0.048	0.042	668
																												672					0.037	0.043	0.049	0.043	672
																												676					0.03675	0.04275	0.04875	0.04375	676
																												680					0.03875	0.04275	0.04975	0.04375	680
																												684					0.03775	0.04375	0.04875	0.04375	684
																												688					0.03925	0.04325	0.05025	0.04425	688
																												692					0.03875	0.04375	0.04975	0.04475	692
																												696					0.03975	0.04375	0.05075	0.04475	696
																												700					0.04075	0.04375	0.04975	0.04475	700

## Sheet: Prism results
	yws1791	yws1792	yws1793	yws1794	yws1795	yws1796	yws1797	yws1798	yws1799	yws1800
Exponential growth equation
Best-fit values
Y0	0.03293	0.03672	0.03116	0.02837	0.02515	0.02053	0.02967	0.02403	0.0345	0.02143
k	0.00465	0.004735	0.002344	0.002432	0.002459	0.0025	0.002132	0.0007873	0.002059	0.0007605
Tau	215.1	211.2	426.7	411.1	406.7	400	468.9	1270	485.7	1315
Doubling Time (min)	149.1	146.4	295.8	285	281.9	277.3	325.1	880.4	336.7	911.4
Std. Error
Y0	0.000338	0.0003701	0.0002228	0.0003187	0.0001479	0.0001381	0.0004807	0.0003046	0.0002801	0.0002515
k	2.914e-05	2.853e-05	1.807e-05	2.821e-05	1.475e-05	1.682e-05	3.987e-05	2.644e-05	1.941e-05	3.187e-05
95% Confidence Intervals
Y0	0.03226 to 0.03359	0.03599 to 0.03745	0.03073 to 0.03160	0.02775 to 0.02900	0.02486 to 0.02544	0.02026 to 0.02080	0.02873 to 0.03062	0.02343 to 0.02463	0.03395 to 0.03505	0.02093 to 0.02192
k	0.004593 to 0.004707	0.004679 to 0.004791	0.002308 to 0.002379	0.002377 to 0.002488	0.002430 to 0.002488	0.002467 to 0.002533	0.002054 to 0.002211	0.0007354 to 0.0008392	0.002021 to 0.002097	0.0006979 to 0.0008231
Tau	212.4 to 217.7	208.7 to 213.7	420.3 to 433.3	402.0 to 420.7	402.0 to 411.6	394.8 to 405.4	452.3 to 486.8	1192 to 1360	476.9 to 494.9	1215 to 1433
Doubling Time	147.2 to 150.9	144.7 to 148.1	291.4 to 300.3	278.6 to 291.6	278.6 to 285.3	273.7 to 281.0	313.5 to 337.4	825.9 to 942.6	330.6 to 343.0	842.1 to 993.2
Goodness of Fit
Degrees of Freedom	382	382	534	534	534	534	554	602	562	562
R square	0.9889	0.9899	0.9742	0.944	0.9839	0.9797	0.8579	0.5978	0.9593	0.5068
Absolute Sum of Squares	0.01549	0.01924	0.007448	0.01575	0.003427	0.003036	0.03556	0.009027	0.01218	0.006154
Sy.x	0.006367	0.007096	0.003735	0.005431	0.002533	0.002384	0.008012	0.003872	0.004655	0.003309
Number of points
Analyzed	384	384	536	536	536	536	556	604	564	564
from PRISM6	Prism Doubling Time (min)	Prism ±(95% confidence interval)	R square
yws1791	149.1	1.9	0.9889
yws1792	146.4	1.7	0.9899
yws1793	295.8	4.4	0.9742
yws1794	285	6.4	0.944
yws1795	281.9	3.3	0.9839
yws1796	277.3	3.6	0.9797
yws1797	325.1	11.6	0.8579
yws1798	880.4	54.5	0.5978
yws1799	336.7	6.1	0.9593
yws1800	911.4	69.3	0.5068
