# Supplementary material for: A shunt pathway limits the CaaX processing of Hsp40 Ydj1p and regulates Ydj1p-dependent phenotypes
Source: eLife. 2016 Aug 15;5:e15899. doi: 10.7554/eLife.15899 (PMC5014548; doi:10.7554/eLife.15899)
Supplement: Figure 4—source data 1. — DOI: http://dx.doi.org/10.7554/eLife.15899.010 [file elife-15899-fig4-data1.xlsx]

## Sheet: Sheet1
				Puncta									Puncta
Date	Background			0	1	2	3	4	5	6+	# cells		0	1+	0 puncta	1+ puncta
2.9.2016	ydj1	CASQ (31)	yWS 1972	31	0	0	0	0	0	0	31		31	0	1	0
		SASQ (37)	yWS 1973	37	0	0	0	0	0	0	37		37	0	1	0
		CTLM (43)	yWS 1974	1	0	0	0	0	0	42	43		1	42	0.0232558	0.976744
		CVIA (32)	yWS1975	1	1	1	1	3	1	24	32		1	31	0.03125	0.96875
	ydj1 ste14	CASQ (41)	yWS 1976	41	0	0	0	0	0	0	41		41	0	1	0
		SASQ (25)	yWS 1977	25	0	0	0	0	0	0	25		25	0	1	0
		CTLM (34)	yWS 1978	31	2	0	0	0	0	1	34		31	3	0.911765	0.0882353
		CVIA (45)	yWS 1979	44	1	0	0	0	0	0	45		44	1	0.977778	0.0222222
				Puncta									Puncta
				0	1	2	3	4	5	6+	# cells		0	1+	0 puncta	1+ puncta
2.16.2016	ydj1	CASQ (24)	yWS 1972	24	0	0	0	0	0	0	24		24	0	1	0
		SASQ (37)	yWS 1973	37	0	0	0	0	0	0	37		37	0	1	0
		CTLM (48)	yWS 1974	6	4	5	8	4	2	19	48		6	42	0.125	0.875
		CVIA (44)	yWS 1975	6	4	11	5	6	1	11	44		6	38	0.136364	0.863636
	ydj1 ste14	CASQ (22)	yWS 1976	22	0	0	0	0	0	0	22		22	0	1	0
		SASQ (31)	yWS 1977	31	0	0	0	0	0	0	31		31	0	1	0
		CTLM (44)	yWS 1978	43	1	0	0	0	0	0	44		43	1	0.977273	0.0227273
		CVIA (50)	yWS 1979	46	0	1	0	1	0	2	50		46	4	0.92	0.08
				Puncta									Puncta
				0	1	2	3	4	5	6+	# cells		0	1+	0 puncta	1+ puncta	range
average	ydj1	CASQ (55)	yWS1972	55	0	0	0	0	0	0	55		55	0	1	0	0
n=2		SASQ (74)	yWS 1973	74	0	0	0	0	0	0	74		74	0	1	0	0
		CTLM (91)	yWS 1974	7	4	5	8	4	2	61	91		7	84	0.0769231	0.923077	0.0508721
		CVIA (76)	yWS 1975	7	5	12	6	9	2	35	76		7	69	0.0921053	0.907895	0.0525568
	ydj1 ste14	CASQ (63)	yWS 1976	63	0	0	0	0	0	0	63		63	0	1	0	0
		SASQ (56)	yWS 1977	56	0	0	0	0	0	0	56		56	0	1	0	0
		CTLM (78)	yWS 1978	74	3	0	0	0	0	1	78		74	4	0.948718	0.0512821	0.032754
		CVIA (95)	yWs 1979	90	1	1	0	1	0	2	95		90	5	0.947368	0.0526316	0.0288889
				Puncta									Puncta
Date	Background			0	1	2	3	4	5	6+	# cells		0	1+	0 puncta	1+ puncta
12.2.2015	WT	CASQ (14)	yWS 1946	14	0	0	0	0	0	0	14		14	0	1	0
		SASQ (23)	yWS 1947	23	0	0	0	0	0	0	23		23	0	1	0
		CTLM (11)	yWS 1948	0	0	2	1	1	1	6	11		0	11	0	1
		CVIA (29)	yWS 1949	0	0	1	4	6	4	14	29		0	29	0	1
	ste14∆	CASQ (18)	yWS 1950	15	1	0	0	1	0	1	18		15	3	0.833333	0.166667
		SASQ (16)	yWS 1951	16	0	0	0	0	0	0	16		16	0	1	0
		CTLM (18)	yWS 1952	17	1	0	0	0	0	0	18		17	1	0.944444	0.0555556
		CVIA (19)	yWS 1953	16	0	0	1	0	0	2	19		16	3	0.842105	0.157895
